# Supplementary material for: Prolonged higher dose methylprednisolone versus conventional dexamethasone in COVID-19 pneumonia: a randomised controlled trial (MEDEAS)
Source: PubMed Central journal article supplement — Eur Respir J. 2023 Apr 20;61(4):2201514. doi: 10.1183/13993003.01514-2022 (PMC9650195; doi:10.1183/13993003.01514-2022), 2023-04-20
Supplement: ERJ-01514-2022.Shareable.pdf [file ERJ-01514-2022.Shareable.pdf]

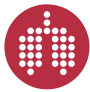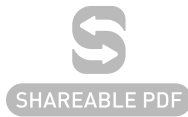

# Prolonged higher dose methylprednisolone *versus* conventional dexamethasone in COVID-19 pneumonia: a randomised controlled trial (MEDEAS)

Francesco Salton <sup>1,2</sup>, Paola Confalonieri <sup>1,2</sup>, Stefano Centanni <sup>3</sup>, Michele Mondoni <sup>3</sup>, Nicola Petrosillo <sup>4</sup>, Paolo Bonfanti<sup>5,6</sup>, Giuseppe Lapadula <sup>5,6</sup>, Donato Lacedonia<sup>7</sup>, Antonio Voza <sup>8</sup>, Nicoletta Carpenè<sup>9</sup>, Marcella Montico <sup>1</sup>, Nicolò Reccardini<sup>1,2</sup>, Gianfranco Meduri<sup>10</sup>, Barbara Ruaro <sup>1,2</sup>, MEDEAS Collaborative Group<sup>11</sup> and Marco Confalonieri <sup>1,2</sup>

<sup>1</sup>Department of Pulmonology, University Hospital of Cattinara, Trieste, Italy. <sup>2</sup>Department of Medical, Surgical and Health Sciences, University of Trieste, Trieste, Italy. <sup>3</sup>Department of Health Sciences – Università degli Studi di Milano, Respiratory Unit ASST Santi Paolo e Carlo, Milan, Italy. <sup>4</sup>Infection Prevention and Control – Infectious Disease Service, Foundation University Hospital Campus Bio-Medico, Rome, Italy. <sup>5</sup>Infectious Diseases Unit, ASST Monza, San Gerardo Hospital, Monza, Italy. <sup>6</sup>School of Medicine, University of Milan-Bicocca, Milan, Italy. <sup>7</sup>Department of Medical and Surgical Sciences – University of Foggia, Policlinico Riuniti, Foggia, Italy. <sup>8</sup>Emergency Medicine Unit, IRCCS Humanitas Research Hospital, Milan, Italy. <sup>9</sup>Pulmonary Unit, Cardio-Thoracic and Vascular Department, University Hospital of Pisa, Pisa, Italy. <sup>10</sup>Department of Medicine, Division of Pulmonary, Critical Care, and Sleep Medicine, University of Tennessee Health Science Center, Memphis, TN, USA. <sup>11</sup>A full list of the MEDEAS Collaborative Group members and their affiliations can be found in the Acknowledgements section.

Corresponding author: Francesco Salton ([francesco.salton@asugi.sanita.fvg.it](mailto:francesco.salton@asugi.sanita.fvg.it))

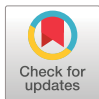

Shareable abstract (@ERSpublications)

**Infusive methylprednisolone did not show major advantages over conventional dexamethasone in severe COVID-19 pneumonia, confirming the favourable drug class effect of prolonged, low-dose glucocorticoids postulated by current guidelines** <https://bit.ly/3zxSwMn>

**Cite this article as:** Salton F, Confalonieri P, Centanni S, *et al.* Prolonged higher dose methylprednisolone *versus* conventional dexamethasone in COVID-19 pneumonia: a randomised controlled trial (MEDEAS). *Eur Respir J* 2023; 61: 2201514 [DOI: 10.1183/13993003.01514-2022].

This single-page version can be shared freely online.

Copyright ©The authors 2023.

This version is distributed under the terms of the Creative Commons Attribution Non-Commercial Licence 4.0. For commercial reproduction rights and permissions contact [permissions@ersnet.org](mailto:permissions@ersnet.org)

This article has an editorial commentary:  
<https://doi.org/10.1183/13993003.00270-2023>

Received: 1 Aug 2022  
Accepted: 23 Oct 2022

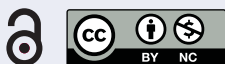

## Abstract

**Background** Dysregulated systemic inflammation is the primary driver of mortality in severe coronavirus disease 2019 (COVID-19) pneumonia. Current guidelines favour a 7–10-day course of any glucocorticoid equivalent to dexamethasone 6 mg daily. A comparative randomised controlled trial (RCT) with a higher dose and a longer duration of intervention was lacking.

**Methods** We conducted a multicentre, open-label RCT to investigate methylprednisolone 80 mg as a continuous daily infusion for 8 days followed by slow tapering *versus* dexamethasone 6 mg once daily for up to 10 days in adult patients with COVID-19 pneumonia requiring oxygen or noninvasive respiratory support. The primary outcome was reduction in 28-day mortality. Secondary outcomes were mechanical ventilation-free days at 28 days, need for intensive care unit (ICU) referral, length of hospitalisation, need for tracheostomy, and changes in C-reactive protein (CRP) levels, arterial oxygen tension/inspiratory oxygen fraction ( $P_{aO_2}/F_{IO_2}$ ) ratio and World Health Organization Clinical Progression Scale at days 3, 7 and 14.

**Results** 677 randomised patients were included. Findings are reported as methylprednisolone (n=337) *versus* dexamethasone (n=340). By day 28, there were no significant differences in mortality (35 (10.4%) *versus* 41 (12.1%);  $p=0.49$ ) nor in median mechanical ventilation-free days (median (interquartile range (IQR)) 23 (14) *versus* 24 (16) days;  $p=0.49$ ). ICU referral was necessary in 41 (12.2%) *versus* 45 (13.2%) ( $p=0.68$ ) and tracheostomy in 8 (2.4%) *versus* 9 (2.6%) ( $p=0.82$ ). Survivors in the methylprednisolone group required a longer median (IQR) hospitalisation (15 (11) *versus* 14 (11) days;  $p=0.005$ ) and experienced an improvement in CRP levels, but not in  $P_{aO_2}/F_{IO_2}$  ratio, at days 7 and 14. There were no differences in disease progression at the prespecified time-points.

**Conclusion** Prolonged, higher dose methylprednisolone did not reduce mortality at 28 days compared with conventional dexamethasone in COVID-19 pneumonia.
